# Supplementary material for: Drought responsiveness in six wheat genotypes: identification of stress resistance indicators
Source: PubMed Central journal article supplement (PMC10534941; doi:10.3389/fpls.2023.1232583), 2023-09-13

## *Supplementary Material*

### **Drought responsiveness in six wheat genotypes: identification of stress resistance indicators**

**Asma Guizani<sup>1\*</sup>, Hend Askri<sup>2</sup>, Maria Laura Amenta<sup>3</sup>, Roberto Defez<sup>3</sup>, Elyes Babay<sup>4,5</sup>, Carmen Bianco<sup>3\*</sup>, Nicoletta Rapana<sup>6</sup>, Mariella M Finetti-Sialer<sup>6</sup>, Fatma Gharbi<sup>1</sup>**

<sup>1</sup>Laboratory of Mycology, Pathologies and Biomarkers LR16ES05, Faculty of Sciences of Tunis, 2092 Tunis, University of Tunis El Manar, Tunis, Tunisia;

<sup>2</sup>Laboratory of Valorization of Non-Conventional Water (LR16INRGREF02), National Institute of Rural Engineering, Water and Forestry, Carthage University, Tunis 1004, Tunisia;

<sup>3</sup>Institute of Biosciences and BioResources, Via P. Castellino 111, 80131 Naples, Italy;

<sup>4</sup>*National Gene Bank of Tunisia (BNG), Tunis, Tunisia;*

<sup>5</sup>*Agricultural Applied Biotechnology Laboratory (LR16INRAT06), Institut National de la Recherche Agronomique de Tunisie (INRAT), University of Carthage, Tunis, Tunisia.*

<sup>6</sup>Institute of Biosciences and BioResources, Via G. Amendola 165/A, Bari, Italy

**\*Correspondence:**

Carmen Bianco, [carmen.bianco@ibbr.cnr.it](mailto:carmen.bianco@ibbr.cnr.it)

Asma Guizani, [guizani\\_asma9@yahoo.fr](mailto:guizani_asma9@yahoo.fr)

## 1 Supplementary Tables

**Table S1.** P-values obtained from two-way analyses of variance (ANOVA) carried out for all studied parameters.

| Parameters            | P value Treatment | P value Genotype | P value G*T interaction |
|-----------------------|-------------------|------------------|-------------------------|
| $\Psi_{\pi}^{100}$    | $p < 0.001$       | $p < 0.005$      | $p > 0.05$              |
| $\Psi_{\pi}^0$        | $p < 0.001$       | $p < 0.05$       | $p < 0.05$              |
| RWC <sub>0</sub>      | $p > 0.05$        | $p > 0.05$       | $p > 0.05$              |
| AWC                   | $p < 0.001$       | $p < 0.01$       | $p < 0.001$             |
| $\epsilon_{max}$      | $p < 0.001$       | $p < 0.001$      | $p < 0.001$             |
| Proline               | $p < 0.001$       | $p < 0.001$      | $p < 0.001$             |
| Sucres                | $p < 0.001$       | $p < 0.001$      | $p < 0.001$             |
| Na <sup>+</sup>       | $p > 0.05$        | $p > 0.05$       | $p > 0.05$              |
| K <sup>+</sup>        | $p > 0.05$        | $p < 0.001$      | $p < 0.05$              |
| Ca <sup>2+</sup>      | $p > 0.05$        | $p < 0.001$      | $p > 0.05$              |
| Ci                    | $p < 0.01$        | $p > 0.05$       | $p > 0.05$              |
| E                     | $p < 0.05$        | $p < 0.001$      | $p < 0.001$             |
| gs                    | $p < 0.01$        | $p < 0.001$      | $p < 0.005$             |
| A                     | $p < 0.001$       | $p < 0.001$      | $p < 0.001$             |
| WUE                   | $p < 0.001$       | $p < 0.001$      | $p < 0.001$             |
| iWUE                  | $p < 0.01$        | $p > 0.05$       | $p > 0.05$              |
| LA                    | $p < 0.001$       | $p < 0.001$      | $p < 0.005$             |
| Chl                   | $p < 0.001$       | $p > 0.05$       | $p < 0.05$              |
| SD <sub>(lower)</sub> | $p < 0.001$       | $p < 0.001$      | $p < 0.001$             |
| SD <sub>(upper)</sub> | $p < 0.001$       | $p < 0.05$       | $p < 0.001$             |
| MDA                   | $p < 0.001$       | $p < 0.001$      | $p < 0.001$             |
| EL                    | $p < 0.001$       | $p < 0.001$      | $p < 0.001$             |
| BY                    | $p < 0.001$       | $p < 0.001$      | $p < 0.001$             |
| GY                    | $p < 0.001$       | $p < 0.001$      | $p < 0.05$              |
| GN                    | $p < 0.001$       | $p < 0.001$      | $p < 0.05$              |
| TGW                   | $p < 0.001$       | $p < 0.001$      | $p < 0.01$              |
| AAO                   | $p < 0.001$       | $p < 0.001$      | $p < 0.001$             |
| PIP2:1                | $p < 0.001$       | $p < 0.001$      | $p < 0.001$             |

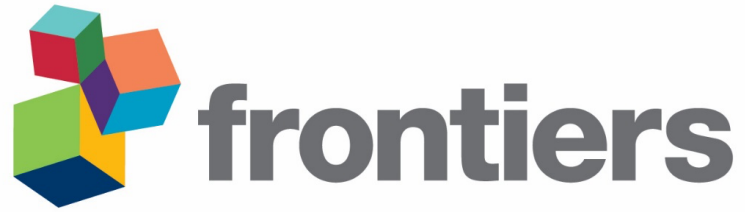

Supplement: DataSheet_1.pdf [file DataSheet_1.pdf]
